# Supplementary material for: Observation of optical gyromagnetic properties in a magneto-plasmonic metamaterial
Source: Research Square preprint supplement (doi:10.21203/rs.3.rs-954112/v1), 2021-11-01
Supplement: Supplementary file 1 [file 2debb535efa9de8e1c2efc4c.docx]

**Supplementary Information**

**Observation of optical gyromagnetic properties in a magneto-plasmonic metamaterial**

Weihao Yang, 1§ Qing Liu,2§ Hanbin Wang,3§ Yiqin Chen, 2§ Run Yang,1 Shuang Xia,1 Yi Luo,3 Longjiang Deng,1 Jun Qin,1* Huigao Duan,2* and Lei Bi1*

1National Engineering Center of Electromagnetic Radiation Control Materials

School of Electronic Science and Engineering, University of Electronic Science and Technology of China, Chengdu, China, 610054

2College of Mechanical and Vehicle Engineering, Hunan University, Changsha 410082, China

3Microsystem and Terahertz Research Center, China Academy of Engineering Physics, Chengdu 610200, China

E-mail: [qinjun@uestc.edu.cn](mailto:qinjun@uestc.edu.cn), [duanhg@gmail.com](mailto:duanhg@gmail.com), bilei@uestc.edu.cn

§These authors contributed equally

**Supplementary Note 1: X-ray diffraction (XRD) and Faraday rotation of the** **Ce:YIG/YIG films on silicon**


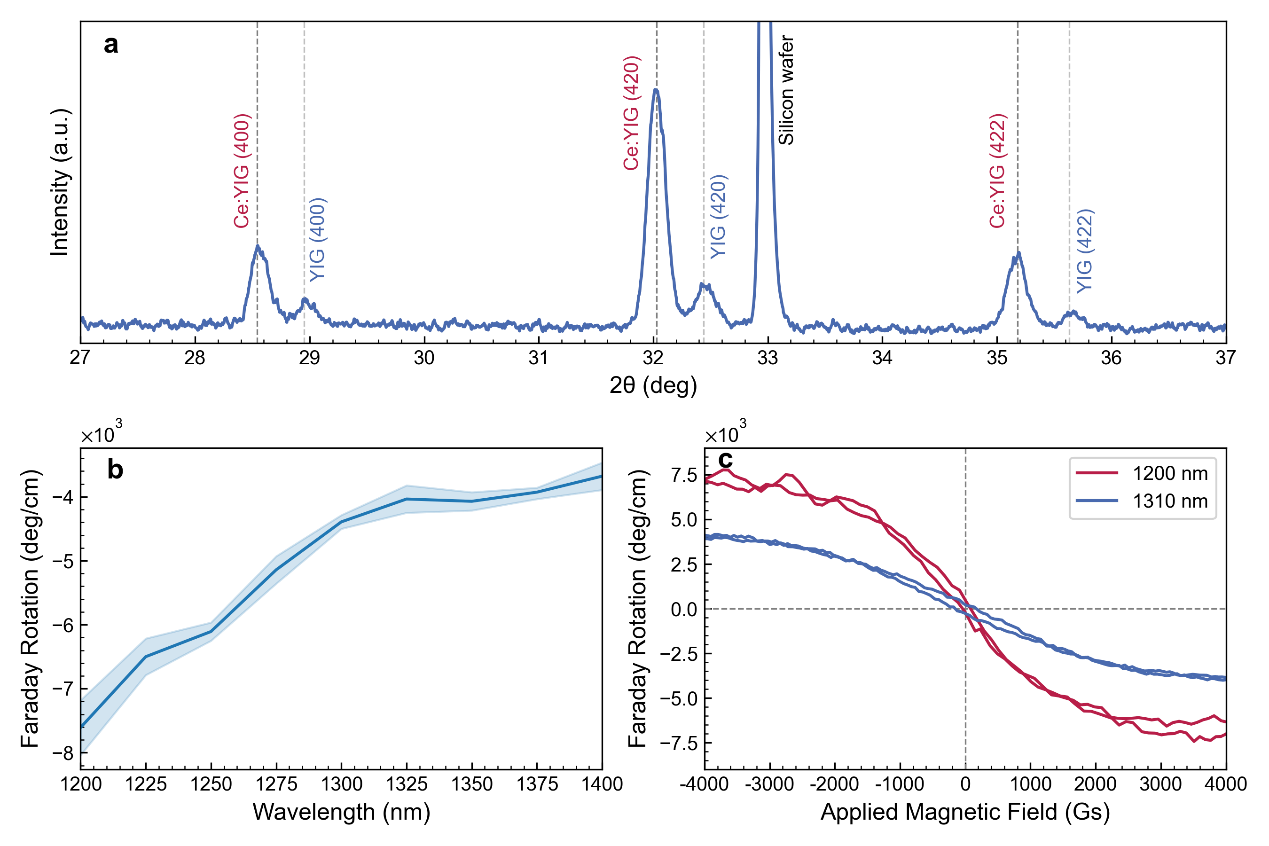


**Supplementary Figure 1.** **XRD and Faraday rotation under normal incidence.** **a**, Measured XRD spectra of the Ce:YIG/YIG films on a Si substrate. **b**, Measured Faraday rotation spectra of the Ce:YIG/YIG films on Si under normal incidence. **c**, Measured Faraday rotation hysteresis of the Ce:YIG/YIG films on Si at 1200 nm and 1310 nm wavelengths.

**Supplementary Note 2: Transmission spectra under normal incidence**


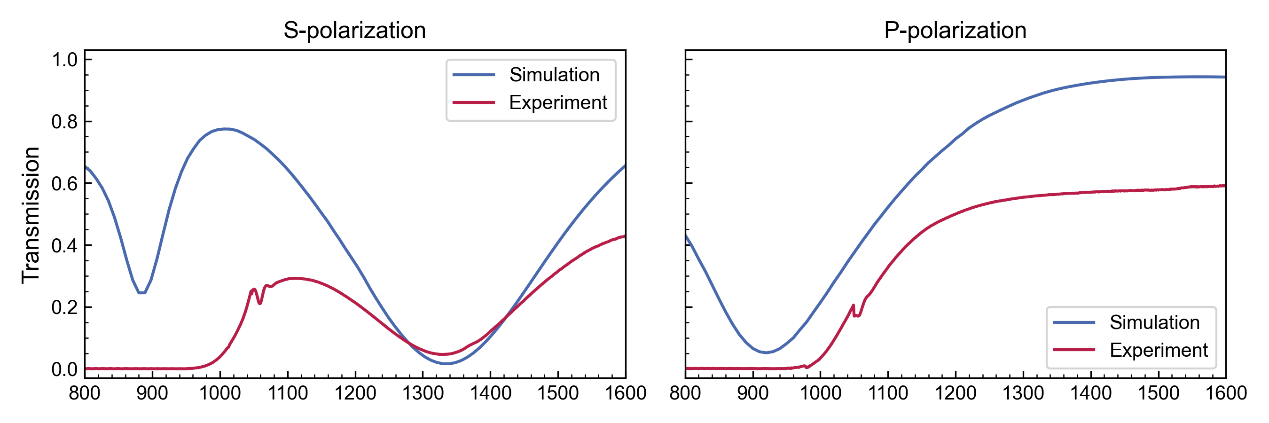


**Supplementary Figure 2.** **Transmission spectra under normal incidence. a**, Measured and simulated transmission spectra of the MO-SRR metamaterial for normal s-polarized incidence (electric field parallel to the gap of SRR). **b**, Transmission spectra of the MO-SRR metamaterial for p-polarized incidence (electric field perpendicular to the gap of SRR).

**Supplementary Note 3: Simulated s-polarized TMOKE of the metamaterial under different incident angles**

As increasing the incident angles, the TMOKE of the structure under s-polarization increases first and then decreases, with a maximum value of 2.7×10-3 at 30°. Due to the angle limitation of the ellipsometer (45°-75°), the strongest s-polarized TMOKE was experimentally measured at 45° incidence.


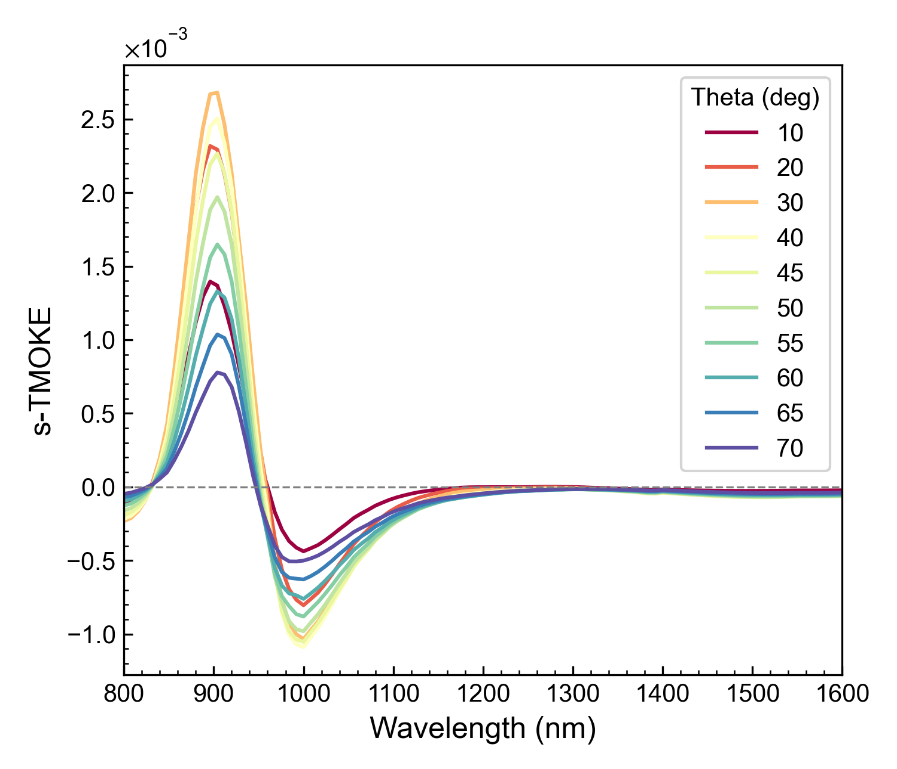


**Supplementary Figure 3.** Simulated TMOKE spectra of the MO-SRR metamaterial for different incident angles ranging from 45° to 70° under s-polarized incidence.

**Supplementary Note 4: P-polarized TMOKE of the Ce:YIG/YIG films on silicon**

We measured the reflection and TMOKE spectra of the bare Ce:YIG/YIG films on Si, as shown in Supplementary Figure4b. The TMOKE exists only for p-polarized incidence. Although the reflectivity for s-polarization is 0.2 under 45° incidence, which is even smaller than the metamaterial, its s-polarized TMOKE is still 0 due to a unity  tensor of the MO materials. We notice a large p-polarized TMOKE of 0.17 at 850 nm wavelength. This is due to a low reflectivity ~0 of the thin films at around the Brewster angle, causing an optical enhancement of the TMOKE.


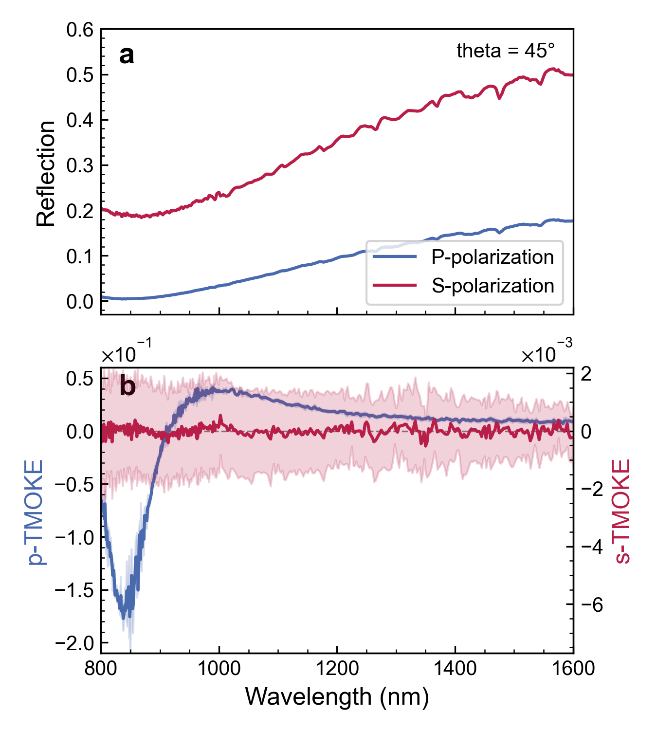


**Supplementary Figure 4.** **Reflection and TMOKE spectra under 45° incidence of the bare film. a**, reflection spectra of the Ce:YIG/YIG films on Si under s- and p-polarized incidence. **b**, TMOKE spectra of the Ce:YIG/YIG films on Si under s- and p-polarized incidence.

**Supplementary Note 5: The step-by-step derivation of metamaterial equivalent material parameters retrieval method**

The incident plane is *x-z* plane, the electric (magnetic) field vector is parallel to the *y* axis for s- (p-) polarization. The equivalent material structure is shown in Supplementary Figure 5b. The thickness of the equivalent material is set to the thickness of the part that does not contain the substrate and air (the distance from the lower surface of the YIG to the upper surface of the gold is 155 nm), and the upper and lower parts of the equivalent material are set to semi-infinite space of air and substrate, respectively. Firstly, we use COMSOL software to simulate the transmission and reflection coefficient of the MO SRR metamaterial. In our COMSOL model, the energy port is needed to set at a certain distance away from the device to avoid the influence of the port on the field distributions, this distance is usually taken to be greater than the maximum wavelength. Therefore, in our simulation, the distance between incident port and the upper surface of gold is *d*1, and the distance between outgoing port and the lower surface of YIG is *d*2, in our model *d*1 = *d*2 = 2 mm, as shown in Supplementary Figure 5b. Since the complex S matrix contains phase information (distance-dependent), the phase change caused by the port needs to be corrected by the following equation1:

(1)

[*S*’] is the raw scattering matrix between the two ports, and , are the wave numbers along the z-axis direction in air and substrate, where , *λ* and *λs* are the wavelengths in air and substrate. The modified parameters are only relevant to the metamaterial itself, and the aforementioned values of *d*1, *d*2 can be taken as any value greater than the maximum wavelength. The corrected *S*21 and *S*11 are corresponding to the transmission (*T*) and reflection (*R*). Then, based on the 2×2 transfer matrix method2-4, the transmission and reflection coefficients of the structure shown in Supplementary Figure 5b can be obtained as a function of its material parameters:

(2)

(3)

Where *ka*, *k*, *ks* are the wave numbers along the z-axis direction in air, metamaterial and substrate. The coefficients *αa,m,s* and A are dependent on the polarization and defined as:

(4)

*a, m, s* stands for air, metamaterial, substrate respectively, *ns* is the index of substrate. Define abbreviations *ka,s* = *αa,ska,s, ξ = αmk*. After using these abbreviations, *T/R* can be written as:

(5)

(6)

By inverse operation, the wave number and impedance coefficients *ξ* in metamaterials can then be obtained by *T/R* from the simulated results:

(7)

(8)

The sign is determined by the specific physical law, +2mπ is to make the value of the equation continuous. Since the wave vector is related to the material parameters, the equivalent material parameters can be derived from the following equation:

(9)

In particular, the equivalent material parameters of the metamaterials appear to have a negative imaginary part, which does not imply energy amplification, but rather indicates the transfer of energy between the magnetic and electric fields5-8. Im (*ε*) < 0 means that energy transfer from the magnetic to the electric field, and Im (*μ*) < 0 means that energy transfer from the electric to the magnetic field.

After achieving the diagonal elements of the  and , we use the 4×4 transfer matrix method to retrieve the off-diagonal elements. In our method, the equivalent layer is expressed by the fully anisotropic materials. Then, the Maxwell’s equations can be written as the matrix differential equation9:

（10）

Here, , , , *k*0 is the wave vector of free space, *z* is the direction of electromagnetic wave propagation, and are the electric and magnetic field. Through solving the matrix differential equation, we can obtain the solution as:

(11)

(12)

Here, the W and **are the eigen-vector matrix and eigen-value matrix of the right-side 4×4 matrix in equation (10), .

For multilayers, combined with the boundary conditions at both interfaces of each layer. We can achieve the transfer matrix:

(13)

Where, *Li* is the thickness of the *i* layer, *i* is the positive integer.

According to above equations, we use the 4×4 transfer matrix to calculate the complex reflection coefficients of the multilayers shown in Supplementary Figure 5c. Here, the complex reflection coefficients are the functions of off-diagonal elements of  or  tensors (s-polarization: , p-polarization:). In order to deduce the off-diagonal elements, we first simulate the complex reflection coefficients of the MO-SRR metamaterial under positive and negative applied magnetic field using COMOSL. Then, we calculate the TMOKE spectrum according to the equation (2) in the manuscript, and phase difference defined as:

(14)

Here, *R*(H±) is the complex reflection coefficient under positive and negative magnetic field respectively. Finally, we use the least square method to fit the simulated TMOKE and phase difference by the 4×4 transfer matrix.


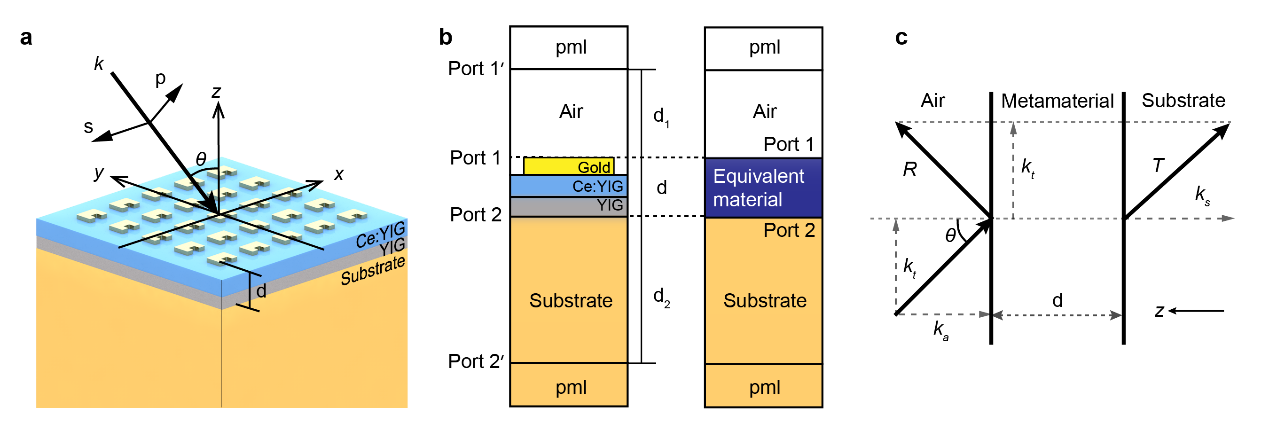


**Supplementary Figure 5.** **Schematic diagram of metamaterial structure and its equivalent material.**

**Supplementary Note 6: Transmission, reflection and TMOKE spectra of equivalent materials and MO-SRR metamaterial**


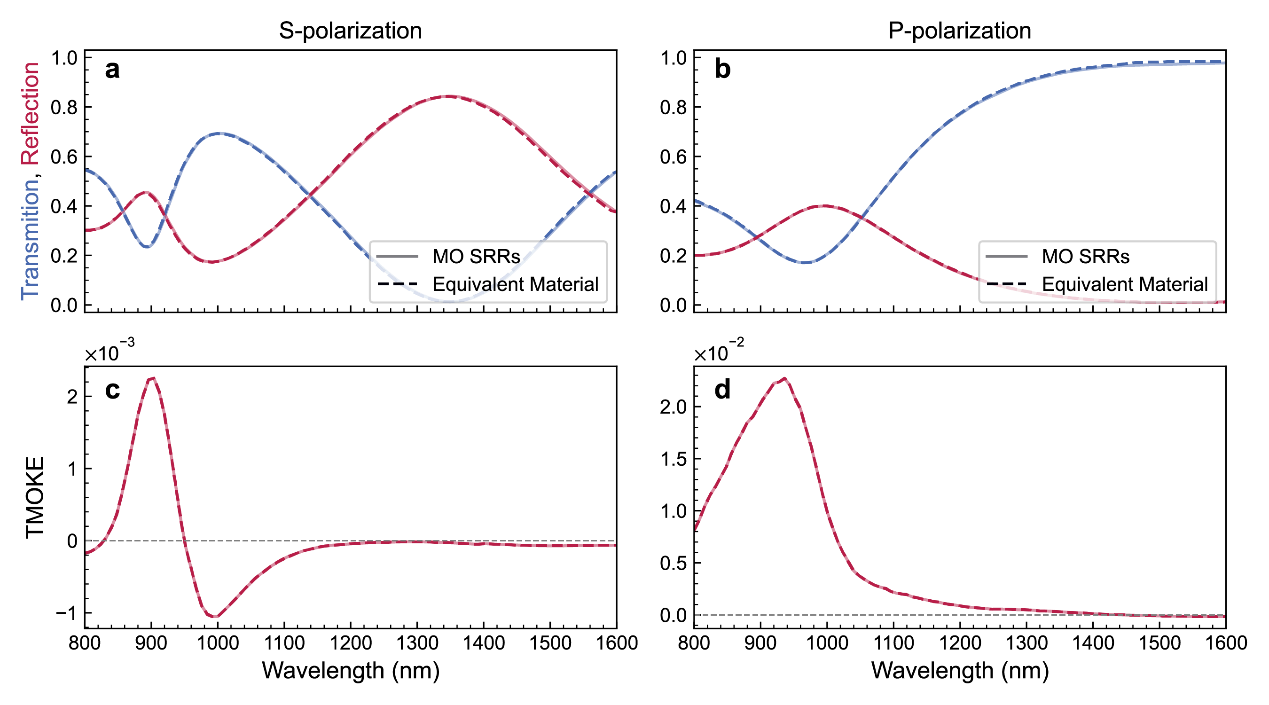


**Supplementary Figure 6.** **Transmission,** **reflection and TMOKE spectra under 45° incidence of equivalent materials. a** and **b**, Transmission and reflection spectra of MO SRR and equivalent material under s- and p-polarized incidence. **b** and **d**, TMOKE spectra of MO SRR and equivalent material under s- and p-polarized incidence. (Solid lines: MO SRR, Dashed lines: equivalent material)

**Supplementary Note 7: Retrieved e and m tensors of recent reported MO metamaterials**


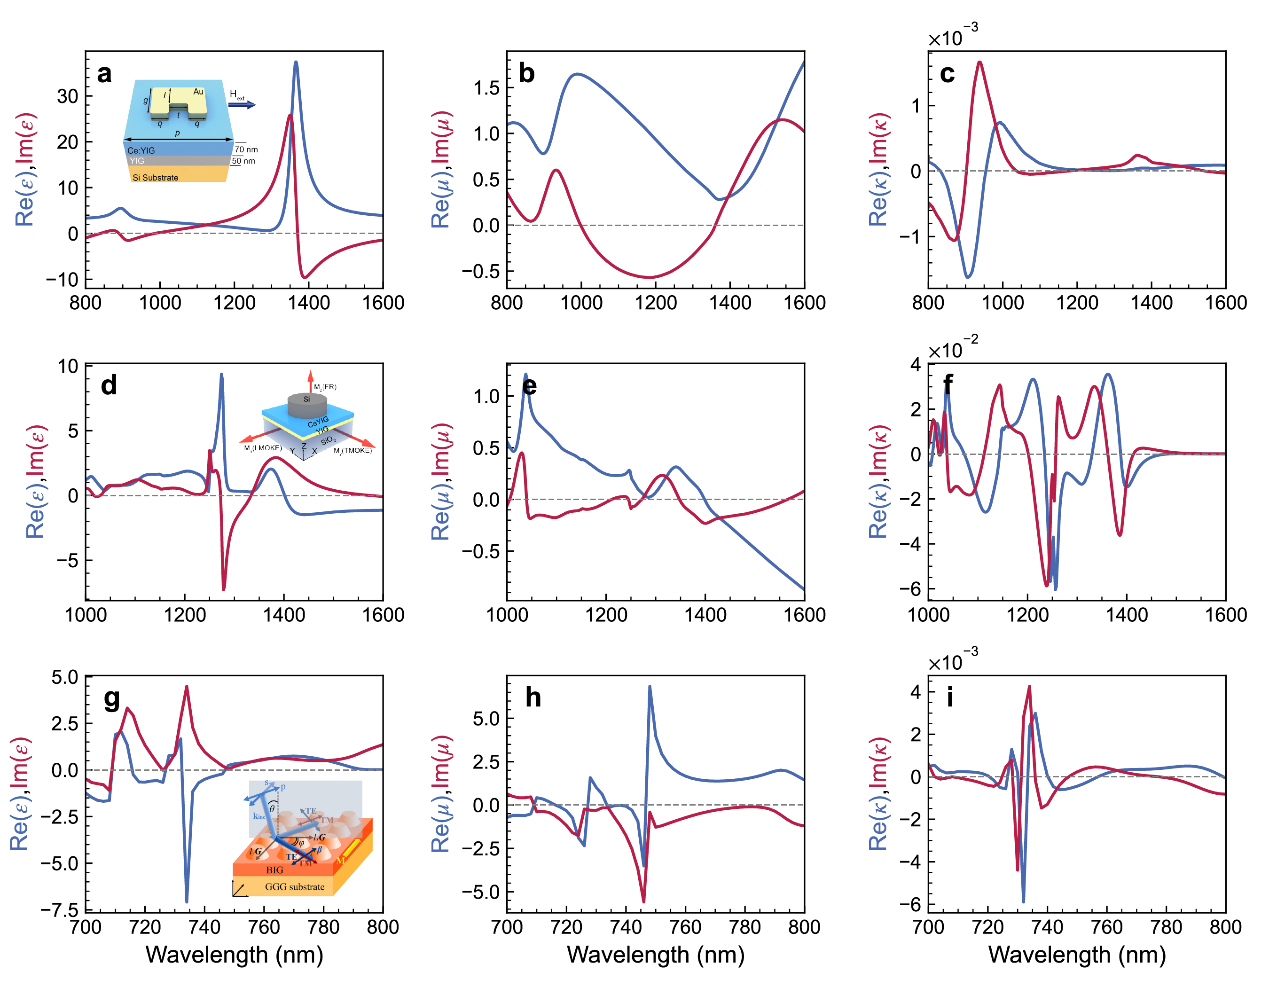


**Supplementary Figure 7. Retrieved e and m tensors of three MO metamaterials.** Retrieved permittivity and permeability tensors spectra, **a**, **b**, **c**, of MO SRR (our work), **d**, **e**, **f**, of high index Mie resonators10, **g**, **h**, **i**, of all-dielectric magnetic metasurface11 (the results obtained in this paper are blue-shifted relative to the reported results, but the main result trends are consistent).

**Supplementary Note 8: Realization of gyroelectric properties at microwave frequencies**

The same SRR structure can also be used to obtain p-polarized TMOKE in the microwave frequencies. As an example, we consider the magneto-optical metamaterial in Supplementary Figure 8a, where the copper SRR10 are located on top of a gyromagnetic material BaFe12O19 (BaM). The microwave is incident with an angle in the *xoz* plane. The magnetic field *Hext* is applied along the *y* direction. The permeability of BaM can be expressed as:

(10)

Here, the *r* is the diagonal elements and ** is magneto-optical coefficients. The permeability tensor of BaM at microwave frequencies can be obtained from previous work9 and the definition of the TMOKE is:

(11)

where *RP/S*(*H*±) is the reflectance of p-polarized (s-polarized) incidence under positive or negative applied magnetic field respectively. In planar BaM materials, the p-TMOKE would vanish because the magnetic field ***Hy*** of the electromagnetic wave is along *y* direction, and the induced dynamic magnetization has nothing to do with **. However, the SRR changes the local magnetic field distribution as shown by the arrows in Supplementary Figure 8a, causing non-zero ***Hx*** components, leading to a clear p-polarized TMOKE and gyroelectric properties. The simulated reflection and p-polarized TMOKE of the metamaterial is shown in Supplementary Figure 8b. The resonance at around 10 GHz corresponds to electric resonance, which is clearly accompanied with a non-zero p-polarized TMOKE.


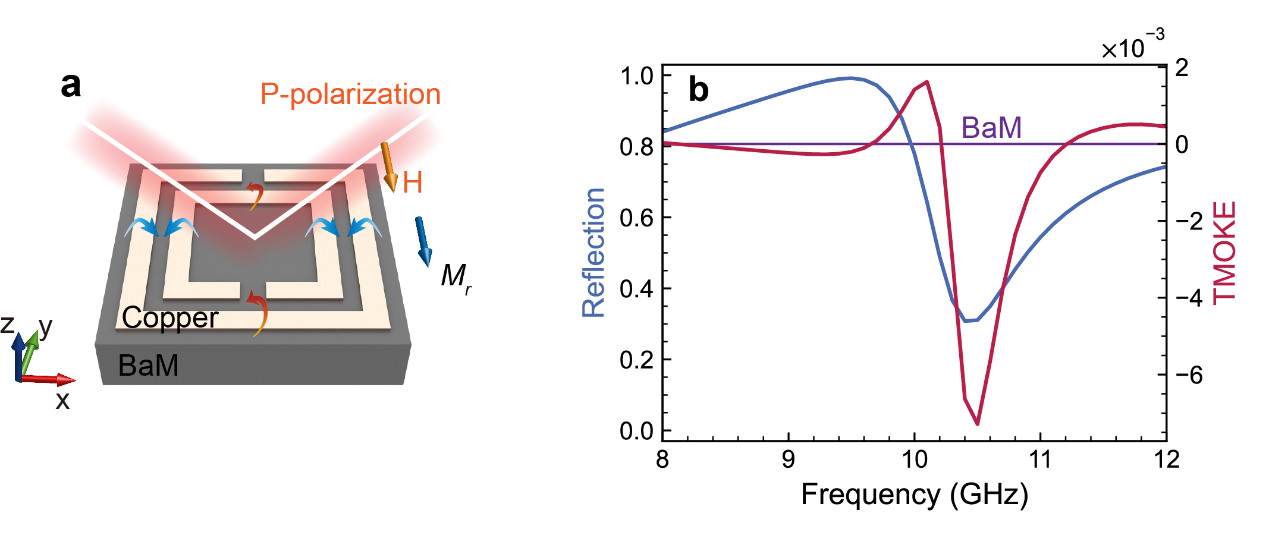


**Supplementary Figure 8.** **Schematic and function of the device. a**, Schematic of the metamaterial. The arrows show the magnetic field distributions. **b**, Reflection and TMOKE spectra of the MO-SRR on BaM under p-polarized incidence.

**Reference**

1. Pozar, D. M. *Microwave engineering*. (John wiley & sons, 2011).

2. Yeh, P. *Optical Waves in Layered Media*. (Wiley, 2005).

3. Menzel, C., Rockstuhl, C., Paul, T., Lederer, F. & Pertsch, T. Retrieving effective parameters for metamaterials at oblique incidence. *Phys. Rev. B* **77**, 195328 (2008).

4. Menzel, C. *et al.* Validity of effective material parameters for optical fishnet metamaterials. *Phys. Rev. B* **81**, 035320 (2010).

5. Koschny, T., Markoš, P., Smith, D. & Soukoulis, C. Resonant and antiresonant frequency dependence of the effective parameters of metamaterials. *Phys. Rev. E* **68**, 065602 (2003).

6. Depine, R. A. & Lakhtakia, A. Comment I on "Resonant and antiresonant frequency dependence of the effective parameters of metamaterials". *Phys. Rev. E* **70**, 048601 (2004).

7. Efros, A. L. Comment II on "Resonant and antiresonant frequency dependence of the effective parameters of metamaterials". *Phys. Rev. E* **70**, 048602 (2004).

8. Andryieuski, A., Malureanu, R. & Lavrinenko, A. *Nested structures approach in designing an isotropic negative-index material for infrared*. Vol. 4 (2009).

9. Korolev, K. A. *et al.* Tunable ferromagnetic resonance in La-Co substituted barium hexaferrites at millimeter wave frequencies. *AIP Advances* **8**, 056440 (2018).

10. Xia, S. *et al.* Circular displacement current induced anomalous magneto-optical effects in high index Mie resonators. *arXiv preprint arXiv:2108.00615* (2021).

11. Ignatyeva, D. O. *et al.* All-dielectric magnetic metasurface for advanced light control in dual polarizations combined with high-Q resonances. *Nat. Commun.* **11**, 5487 (2020).
